# Supplementary material for: T-Cell Density at the Invasive Margin and Immune Phenotypes Predict Outcome in Vulvar Squamous Cell Cancer
Source: MDPI journal article supplement (doi:10.3390/cancers14174246), 2022-08-31
Supplement: s1 [file s1]

# Supplementary Appendix

Manuscript title: T-cell density at the invasive margin and immune phenotypes predict outcome in vulvar squamous cell cancer.

|                                                                                                                                                                                                                   |          |
|-------------------------------------------------------------------------------------------------------------------------------------------------------------------------------------------------------------------|----------|
| <b>Section S1: Supplementary Figures S1 – S4.....</b>                                                                                                                                                             | <b>2</b> |
| Figure S1: Automated cell detection in manually annotated regions.....                                                                                                                                            | 2        |
| Figure S2: Kaplan–Meier Estimates for progression-free survival in vulvar cancer.....                                                                                                                             | 3        |
| Figure S3: Kaplan–Meier Estimates for progression-free survival among patients with different immune phenotypes.....                                                                                              | 4        |
| Figure S4: Prognostic impact of the estimated CD4 <sup>+</sup> T-cell density for overall survival and progression-free survival.....                                                                             | 5        |
| <b>Section S2: Supplementary Tables S1-S3 .....</b>                                                                                                                                                               | <b>6</b> |
| Table S1: Patient characteristics .....                                                                                                                                                                           | 6        |
| Table S2: Association between the estimated density of CD4 <sup>+</sup> T-cells at the invasive margin/ in the center of the tumor and vulvar cancer phenotype. (±Standard deviation). .....                      | 7        |
| Table S3: Multivariate analysis of the prognostic impact of the estimated CD4 <sup>+</sup> T-cell density at the invasive margin and center of the tumor for overall survival and progression free survival. .... | 8        |

## Section S1: Supplementary Figures S1 - S4

### **Figure S1: Automated cell detection in manually annotated regions.**

A trained pathologist has annotated the invasive margin (IM, red) and the center of tumor (CT, blue) so that a machine learning algorithm could be used for cell segmentation in both an “immune desert” (a) as well as “immune inflamed” phenotype (b) to assess the number of positive stained T-cells. The number of positive cells and the size of the annotate region were used to calculate the density of stained cells (number of cells per square mm) for every patient.

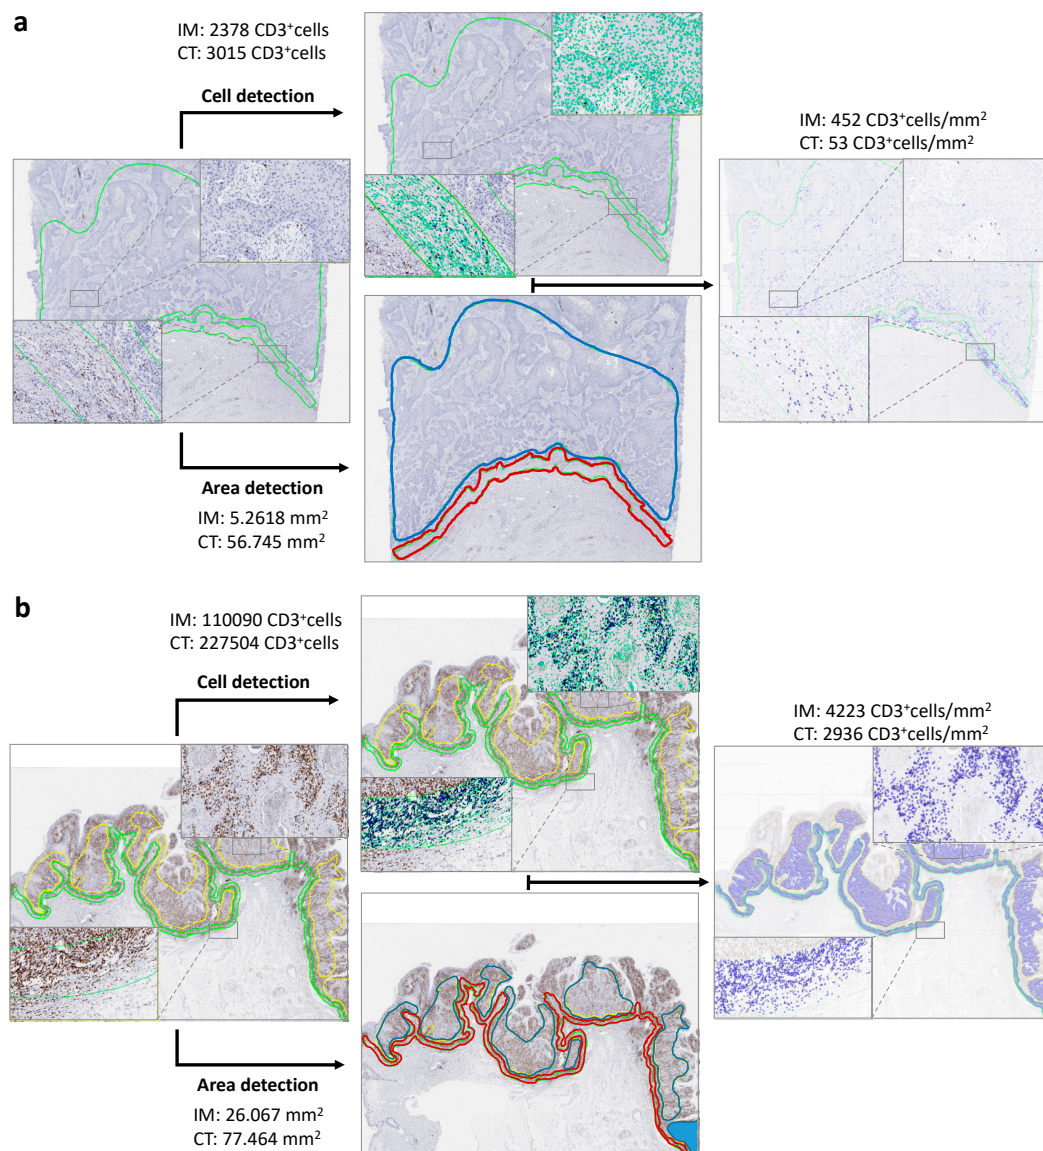

## Figure S2: Kaplan–Meier Estimates for progression-free survival in vulvar cancer.

Prognostic impact of the CD3<sup>+</sup> and CD8<sup>+</sup> T-cell density at the invasive margin (a, b) as well as in the center of the tumor (c, d).

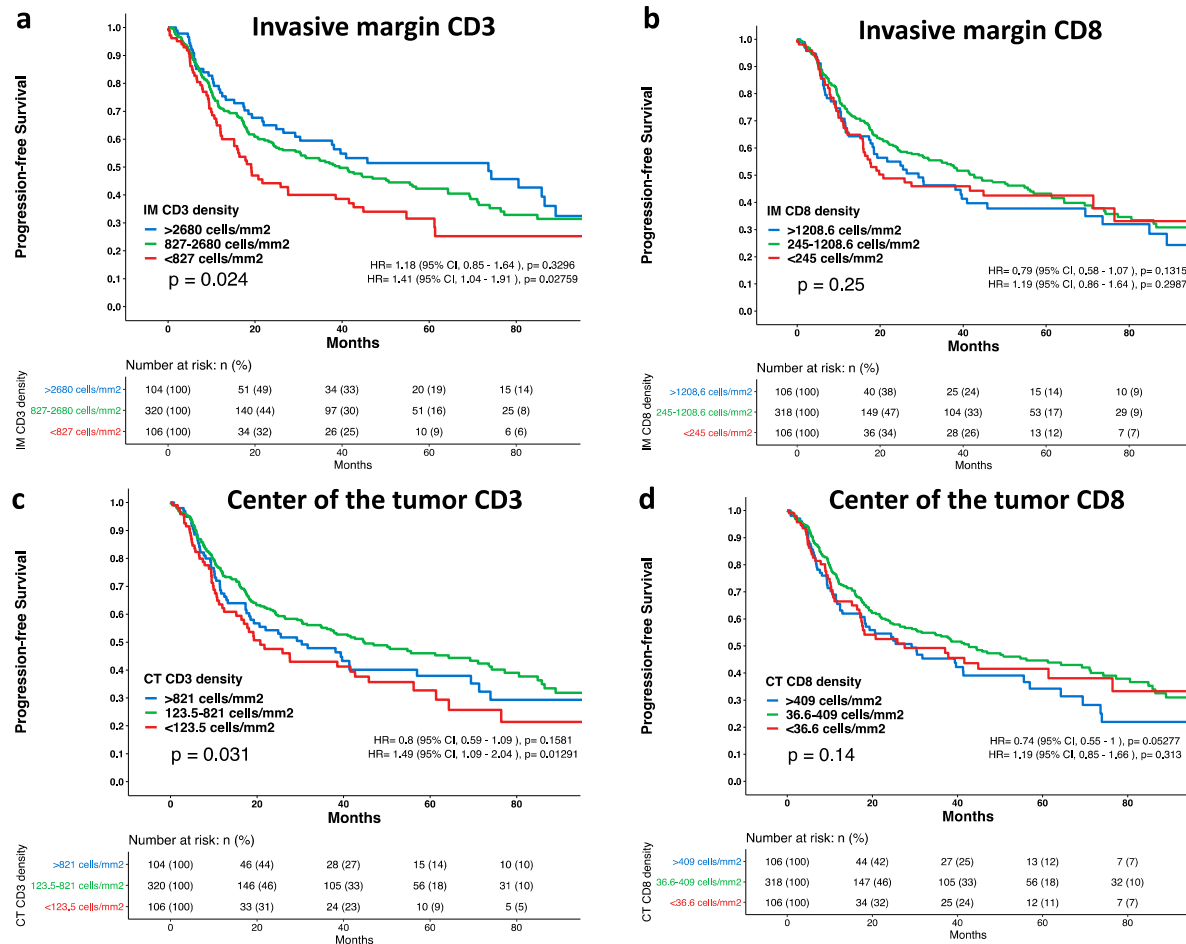

**Figure S3: Kaplan–Meier Estimates for progression-free survival among patients with different immune phenotypes.**

Prognostic impact of the clustered (a) and histomorphological identified (b) immune phenotypes.

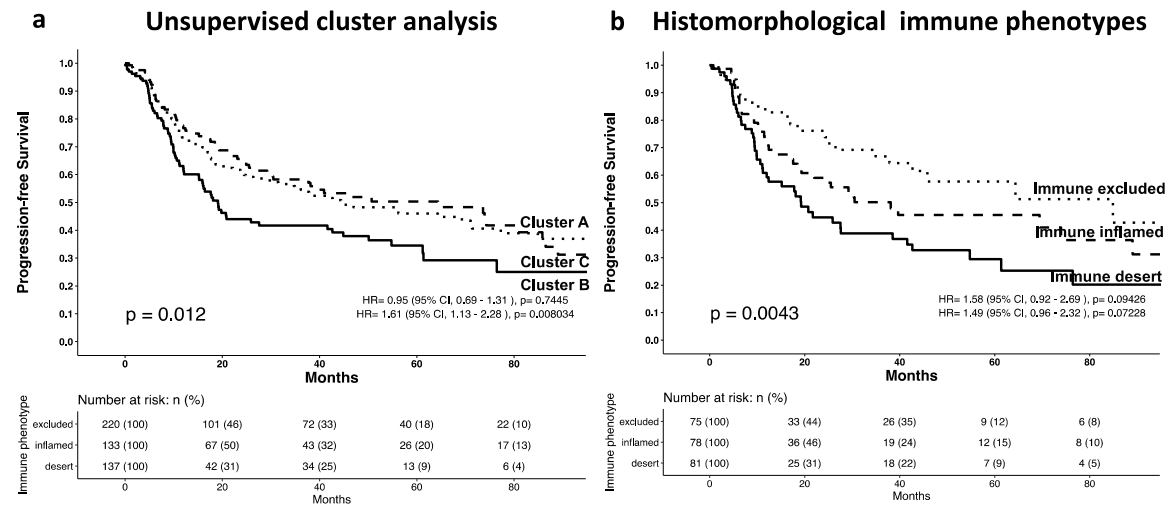

## Figure S4: Prognostic impact of the estimated CD4<sup>+</sup> T-cell density for overall survival and progression-free survival

Kaplan-Meier estimates for the prognostic impact of the estimated CD4<sup>+</sup> T-cell density at the invasive margin and the center of the tumor for overall survival (a,b) and progression free survival (c,d).

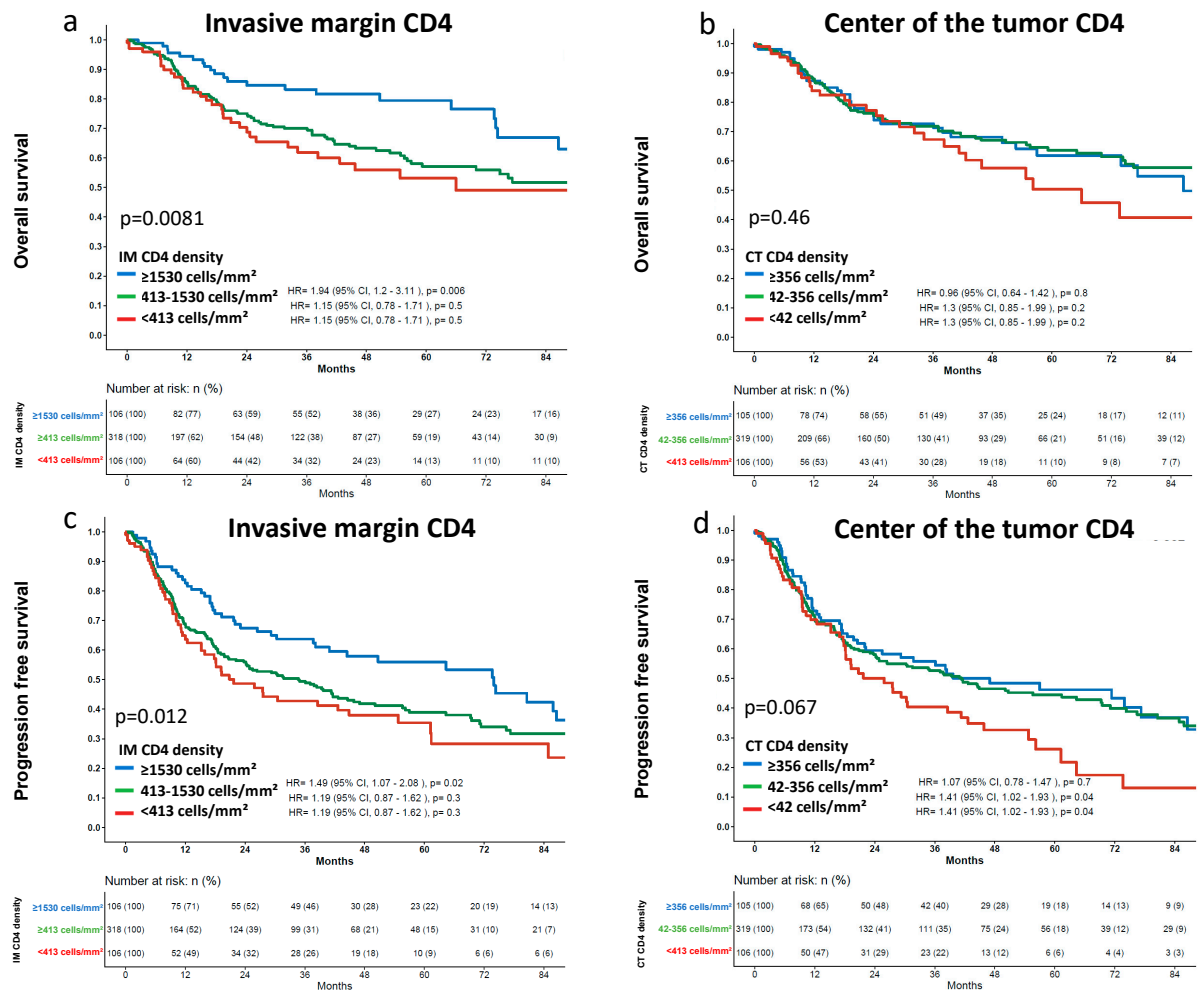

## Section S2: Supplementary Tables S1 - S3

**Table S1: Patient characteristics**

| Patients characteristics                     | No. of patients (%)                  |                                   |                                         |
|----------------------------------------------|--------------------------------------|-----------------------------------|-----------------------------------------|
|                                              | Total study cohort<br>on TMA (n=637) | Overall death among<br>categories | Overall progression<br>among categories |
| Follow-up - no.                              | 637 (100.0%)                         | 181 (28.4%)                       | 303 (47.6%)                             |
| Median - months<br>(95% confidence interval) | 22 (19-26)                           | -                                 | -                                       |
| Age (median) - years                         | 70                                   | -                                 | -                                       |
| pT stage - no. %                             |                                      |                                   |                                         |
| pT1                                          | 206 (32.3%)                          | 33 (18.2%)                        | 72 (23.8%)                              |
| pT2                                          | 347 (54.5%)                          | 117 (64.6%)                       | 181 (59.7%)                             |
| pT3-4                                        | 74 (11.6%)                           | 27 (14.9%)                        | 42 (13.9%)                              |
| missing data                                 | 10 (1.6%)                            | 4 (2.2%)                          | 8 (2.6%)                                |
| pN stage - no. %                             |                                      |                                   |                                         |
| pN0                                          | 339 (53.2%)                          | 62 (34.3%)                        | 118 (38.9%)                             |
| pN+                                          | 219 (34.4%)                          | 91 (50.3%)                        | 139 (45.9%)                             |
| missing data                                 | 79 (12.4%)                           | 28 (15.5%)                        | 46 (15.2%)                              |
| Grade - no. %                                |                                      |                                   |                                         |
| 1                                            | 74 (11.6%)                           | 21 (11.6%)                        | 36 (11.9%)                              |
| 2                                            | 383 (60.1%)                          | 94 (51.9%)                        | 173 (57.1%)                             |
| 3                                            | 169 (26.5%)                          | 65 (35.9%)                        | 89 (29.4%)                              |
| missing data                                 | 11 (1.7%)                            | 1 (0.5%)                          | 5 (1.7%)                                |
| HPV - no. %                                  |                                      |                                   |                                         |
| HPV0                                         | 299 (46.9%)                          | 97 (53.6%)                        | 156 (51.5%)                             |
| HPV+                                         | 306 (48%)                            | 72 (39.8%)                        | 130 (42.9%)                             |
| missing data                                 | 32 (5%)                              | 12 (6.6%)                         | 17 (5.6%)                               |

**Table S2: Association between the estimated density of CD4<sup>+</sup> T-cells at the invasive margin/ in the center of the tumor and vulvar cancer phenotype. (±Standard deviation).**

| <b>Clinical parameter</b> | <b>n</b> | <b>Density of CD4<sup>+</sup> cells (IM*) [cells/mm<sup>2</sup>]</b> | <b>p-value</b> | <b>Density of CD4<sup>+</sup> cells (CT**) [cells/mm<sup>2</sup>]</b> | <b>p-value</b> |
|---------------------------|----------|----------------------------------------------------------------------|----------------|-----------------------------------------------------------------------|----------------|
| pT1                       | 174      | 1209 (±795)                                                          | <0.0001        | 285 (±283)                                                            | 0.0125         |
| pT2                       | 286      | 957 (±656)                                                           |                | 213 (±266)                                                            |                |
| pT3-4                     | 64       | 778 (±585)                                                           |                | 198 (±267)                                                            |                |
| pN-                       | 285      | 1081 (±708)                                                          | 0.0235         | 238 (±260)                                                            | 0.7816         |
| pN+                       | 180      | 928 (±698)                                                           |                | 231 (±284)                                                            |                |
| Grade 1                   | 60       | 1208 (±776)                                                          | 0.0890         | 251 (±333)                                                            | 0.2048         |
| Grade 2                   | 317      | 1000 (±699)                                                          |                | 218 (±233)                                                            |                |
| Grade 3                   | 145      | 983 (±708)                                                           |                | 265 (±323)                                                            |                |
| HPV-                      | 244      | 1014 (±698)                                                          | 0.7978         | 238 (±303)                                                            | 0.8796         |
| HPV+                      | 259      | 1030 (±717)                                                          |                | 234 (±246)                                                            |                |

\*Invasive Margin; \*\*Center of the Tumor

**Table S3: Multivariate analysis of the prognostic impact of the estimated CD4+ T-cell density at the invasive margin and center of the tumor for overall survival and progression free survival.**

| Prognostic Factor                       | Overall Survival                   |         | Progression free survival          |         |
|-----------------------------------------|------------------------------------|---------|------------------------------------|---------|
|                                         | Hazard Ratio<br>(95% CI)           | p-value | Hazard Ratio<br>(95% CI)           | p-value |
| IM CD4 density (cells/mm <sup>2</sup> ) |                                    |         |                                    |         |
| <413 vs. 413-1530                       | 1.30 (0.83 - 2.04) <sup>n.s.</sup> | 0.042   | 1.21 (0.84 - 1.73) <sup>n.s.</sup> | 0.011   |
| 413-1530 vs. ≥1530                      | 1.64 (0.98 - 2.75) <sup>n.s.</sup> |         | 1.63 (1.11 - 2.39)*                |         |
| CT CD4 density (cells/mm <sup>2</sup> ) |                                    |         |                                    |         |
| <42 vs. 42-356                          | 1.54 (0.96 - 2.46) <sup>n.s.</sup> | 0.142   | 1.50 (1.04 - 2.16)*                | 0.087   |
| 42-356 vs. ≥356                         | 0.73 (0.46 - 1.16) <sup>n.s.</sup> |         | 0.95 (0.66 - 1.36) <sup>n.s.</sup> |         |

\*p≤0.05, [ ]:over all p-value, n.s.=not significant
